# Supplementary material
Source: PubMed Central journal article supplement (PMC8256398)
Supplement: 41581_2021_452_MOESM1_ESM.pdf [file 41581_2021_452_MOESM1_ESM.pdf]

**Supplementary information**

---

**Pathophysiology of COVID-19-associated acute kidney injury**

---

In the format provided by the authors and unedited

Supplementary Table 1 | Summary of histological findings in patients with COVID-19 AKI.

| <i>n</i> | Post-mortem | Age (years)         | Mechanical ventilation | Tubular injury             | Acute glomerular Injury                                | Vascular injury                                                                                                                                                                                                                                       | Viral inclusions                                                                 | Technique for virus detection | Comments                                                                                                                                                                                    | Reference                              |
|----------|-------------|---------------------|------------------------|----------------------------|--------------------------------------------------------|-------------------------------------------------------------------------------------------------------------------------------------------------------------------------------------------------------------------------------------------------------|----------------------------------------------------------------------------------|-------------------------------|---------------------------------------------------------------------------------------------------------------------------------------------------------------------------------------------|----------------------------------------|
| 9        | Yes         | 73 (IQR 52–79)      | 4/9                    | Yes (in 9/9)               | No                                                     | Yes (44%; rare thrombi in interlobular arteries in 4 patients)                                                                                                                                                                                        | Viral genomic RNA in 3/5 patients. Subgenomic viral RNA transcripts in 1 patient | Viral RNA                     | No evidence of underlying CKD in any patient                                                                                                                                                | Hanley et al. (2020) <sup>1</sup>      |
| 21       | Yes         | 68 (range 41–78)    | 16/21                  | Yes                        | No                                                     | Yes; 3 (14%) patients showed intravascular neutrophilic aggregates with platelets; 1 (5%) patient showed signs of endothelial activation (mild endothelial swelling and arteriolar sequestration of leukocytes); glomerular microthrombi in 1 patient | SARS-CoV-2-positive cells in 1 patient (9%)                                      | IHC                           | Renal histopathological changes were found in 12 (57%) patients                                                                                                                             | Schurink et al. (2020) <sup>2</sup>    |
| 12       | Yes         | 49–92               | 11/12                  | Yes (from mild to diffuse) | No                                                     | No                                                                                                                                                                                                                                                    | No                                                                               | IHC and ISH                   | 1 patient had findings compatible with mild acute interstitial nephritis; 1 patient exhibited renal oxalosis of uncertain cause; one-third of patients had medullary urate crystal deposits | Golmai et al. (2020) <sup>3</sup>      |
| 17       | No          | 54 (range 34–77)    | No                     | Yes (n=14)                 | Yes, CG (n=7)                                          | Yes; endothelial injury/TMA (n=6)                                                                                                                                                                                                                     | NA                                                                               | EM                            | 15 patients had AKI; 11 patients had proteinuria; 2 of 3 transplant recipients developed active antibody-mediated rejection                                                                 | Akilesh et al. (2020) <sup>4</sup>     |
| 26       | Yes         | 69 (range, 39–87)   | Yes                    | Yes                        | No                                                     | Yes; erythrocyte aggregates obstructing the lumen of capillaries without platelet or fibrinoid material. No evidence of vasculitis or interstitial inflammation                                                                                       | Yes (n=7)                                                                        | EM                            | 9/26 had elevated serum creatinine                                                                                                                                                          | Su et al. (2020) <sup>5</sup>          |
| 17       | No          | 54 (range, 22–72)   | 9/17                   | Yes                        | Yes, (n=5 CG; n=4 immune-mediated glomerular diseases) | Yes; glomerular endothelial tubuloreticular inclusions in 6/10 cases                                                                                                                                                                                  | No                                                                               | IHC and ISH                   | 15/17 had AKI                                                                                                                                                                               | Kudose et al. (2020) <sup>6</sup>      |
| 42       | Yes         | 71.5 (range, 38–97) | 21/42                  | Yes (mild)                 | No, (n=1 collapsing FSGS)                              | Yes, Focal kidney fibrin thrombi in 14% cases                                                                                                                                                                                                         | No                                                                               | ISH of viral RNA              | 94% had AKI                                                                                                                                                                                 | Santoriello et al. (2020) <sup>7</sup> |

|    |     |             |       |                      |                                           |                                                                                            |                                  |           |                                                                                                                                                 |                                      |
|----|-----|-------------|-------|----------------------|-------------------------------------------|--------------------------------------------------------------------------------------------|----------------------------------|-----------|-------------------------------------------------------------------------------------------------------------------------------------------------|--------------------------------------|
| 17 | Yes | 72 (62–77)  | 11/17 | Yes                  | No                                        | No                                                                                         | Yes (n=10)                       | Viral RNA | Hemosiderin and/or pigmented casts seen in 12 of 17 patients                                                                                    | Rommelink et al. (2020) <sup>8</sup> |
| 10 | Yes | 57–82 years | yes   | Yes                  | No, (occasional wrinkling of the GBM)     | Yes; glomerular endothelial swollen (n=1), Intimal hyperplasia,                            | Yes (viral-like particles on EM) | EM        | 1 patient with venous thrombosis                                                                                                                | Xia et al. (2020) <sup>9</sup>       |
| 6  | Yes | 5–82        | NA    | Yes                  | No                                        | Yes; erythrocyte aggregates in peritubular and/or glomerular capillaries in 5/6 patients   | Yes (viral-like particles on EM) | EM        | Focal infiltration of the interstitium by mononuclear cells in 2/6 patients                                                                     | Werion et al. (2020) <sup>10</sup>   |
| 10 | No  | 45–77       | 4/10  | Yes                  | Yes; GC (n=1), pauci-immune crescentic GN | Yes; TMA (n=2)                                                                             | No                               | IHC       | 8 patients had severe AKI requiring KRT                                                                                                         | Sharma et al. (2020) <sup>11</sup>   |
| 6  | No  | 37–65       | 2/6   | Yes (diffuse in 5/6) | Yes; CG                                   | Yes, focal peritubular capillaries RBC aggregates in n=1; swollen endothelial cells in n=3 | No                               | Viral RNA | 3 patients had baseline stage 3 CKD; 1 had drug-induced acute interstitial nephritis; 1 had pleomorphic interstitial infiltrate of immune cells | Wu et al. (2020) <sup>12</sup>       |
| 47 | No  | 52–69       | 28/47 | Yes (in ICU cohort)  | Yes (in non-ICU cohort)                   | TMA (n=1) Arteritis (n=1)                                                                  | No                               | IHC       |                                                                                                                                                 | Ferlicot et al. (2021) <sup>13</sup> |
| 3  | No  | 63–72       | 3/3   | Yes                  | Yes in the patient of African ethnicity   | Low degree of glomerular endothelial cell swelling                                         | No                               | Viral RNA | Strong ACE2 staining was observed in the apical brush border in proximal convoluted tubules                                                     | Dargelos et al. (2020) <sup>14</sup> |

Only cohorts with more than two patients are reported. AKI, acute kidney injury; CG, collapsing glomerulopathy; CKD, chronic kidney disease; EM; electron microscopy; FSGS, focal segmental glomerulosclerosis; GBM, glomerular basement membrane; GN, glomerulonephritis; IHC, immunohistochemistry; ICU, intensive care unit; ISH, in situ hybridization; KRT, kidney replacement therapy; NA, not available; TMA, thrombotic microangiopathy.

## References:

1. Hanley, B. *et al.* Histopathological findings and viral tropism in UK patients with severe fatal COVID-19: a post-mortem study. *Lancet Microbe* **1**, e245–e253 (2020).
2. Schurink, B. *et al.* Viral presence and immunopathology in patients with lethal COVID-19: a prospective autopsy cohort study. *Lancet Microbe* **1**, e290–e299 (2020).
3. Golmai, P. *et al.* Histopathologic and ultrastructural findings in postmortem kidney biopsy material in 12 patients with AKI and COVID-19. *J Am Soc Nephrol* **31**, 1944–1947 (2020).
4. Akilesh, S. *et al.* Multicenter clinicopathologic correlation of kidney biopsies performed in COVID-19 patients presenting with acute kidney injury or proteinuria. *Am J Kidney Dis* **77**, 82–93.e1. (2021)
5. Su, H. *et al.* Renal histopathological analysis of 26 postmortem findings of patients with COVID-19 in China. *Kidney Int.* **98**, 219–227 (2020).
6. Kudose, S. *et al.* Kidney biopsy findings in patients with COVID-19. *JASN* **31**, 1959–1968 (2020).
7. Santoriello, D. *et al.* Postmortem Kidney Pathology Findings in Patients with COVID-19. *J Am Soc Nephrol* **31**, 2158–2167 (2020).

8. Rimmelink, M. *et al.* Unspecific post-mortem findings despite multiorgan viral spread in COVID-19 patients. *Crit Care* **24**, 495 (2020).
9. Xia, P. *et al.* Clinicopathological features and outcomes of acute kidney injury in critically ill COVID-19 with prolonged disease course: a retrospective cohort. *J Am Soc Nephrol* **31**, 2205–2221 (2020).
10. Werion, A. *et al.* SARS-CoV-2 causes a specific dysfunction of the kidney proximal tubule. *Kidney Int* **98**, 1296–1307 (2020).
11. Sharma, P. *et al.* COVID-19-associated kidney injury: a case series of kidney biopsy findings. *J. Am. Soc. Nephrol.* **31**, 1948-1958 (2020).
12. Wu, H. *et al.* AKI and collapsing glomerulopathy associated with COVID-19 and *APOL1* high-risk genotype. *J Am Soc Nephrol* **31**, 1688–1695 (2020).
13. Ferlicot, S. *et al.* The spectrum of kidney biopsies in hospitalized patients with COVID-19, acute kidney injury, and/or proteinuria. *Nephrol Dial Transplant* (2021) doi:10.1093/ndt/gfab042.
14. Dargelos, M. *et al.* Severe acute respiratory syndrome coronavirus 2 indirectly damages kidney structures. *Clin Kidney J* **13**, 1101–1104 (2020).
